# Supplementary material for: Assessment of Body Composition and Physical Performance of Young Soccer Players: Differences According to the Competitive Level
Source: MDPI journal article supplement (doi:10.3390/biology11060823), 2022-05-27
Supplement: s1 [file s1]

## Supplementary materials

**Table S1.** Leave-one-out average-posterior-probabilities classification

|                         |         | LOO Classified |       |
|-------------------------|---------|----------------|-------|
|                         | True    | Bologna        | Russi |
| Number                  | Bologna | 72             | 14    |
| Average posterior prob. |         | 0.896          | 0.729 |
| Number                  | Russi   | 8              | 42    |
| Average posterior prob. |         | 0.76           | 0.862 |
| Number                  | Total   | 80             | 56    |
| Average posterior prob. |         | 0.883          | 0.829 |
|                         | Priors  | 0.5            | 0.5   |

Note: prob., probabilities; LOO, Leave-One-Out

**Table S2.** MANOVA and univariate ANOVA summaries

| MANOVA ( <i>n</i> =136)    |          |          |                   |                       |                            |                   |          |
|----------------------------|----------|----------|-------------------|-----------------------|----------------------------|-------------------|----------|
| Statistic                  | value    | df       | <i>F</i> (7, 128) | <i>P</i>              |                            |                   |          |
| Wilks' lambda (W)          | 0.486    | 1        | 19.37             | <0.001*               |                            |                   |          |
| Pillai's trace (P)         | 0.514    |          | 19.37             | <0.001*               |                            |                   |          |
| Lawley-Hotelling trace (L) | 1.059    |          | 19.37             | <0.001*               |                            |                   |          |
| Residual                   |          | 134      |                   |                       |                            |                   |          |
| Total                      |          | 135      |                   |                       |                            |                   |          |
| ANOVA ( <i>n</i> =136)     |          |          |                   |                       |                            |                   |          |
| Variable                   | Model MS | Resid MS | Total MS          | <i>R</i> <sup>2</sup> | Adj. <i>R</i> <sup>2</sup> | <i>F</i> (1, 134) | <i>P</i> |
| Triceps SK                 | 1.45     | 14.89    | 14.79             | 0.089                 | 0.082                      | 13.06             | <0.001*  |
| Biceps SK                  | 0.88     | 6.64     | 6.6               | 0.117                 | 0.111                      | 17.78             | <0.001*  |
| Suprailiac SK              | 1.6      | 15.19    | 15.09             | 0.095                 | 0.088                      | 14.09             | <0.001*  |
| Medial Calf SK             | 1.45     | 13.91    | 13.82             | 0.095                 | 0.088                      | 14.01             | <0.001*  |
| CMJ test                   | 691.70   | 3901.16  | 3877.39           | 0.151                 | 0.144                      | 23.76             | <0.001*  |
| Sprint 15m test            | 4.27     | 6.25     | 6.23              | 0.406                 | 0.401                      | 91.55             | <0.001*  |
| RSA 20+20m                 | 12.16    | 28.71    | 28.59             | 0.298                 | 0.292                      | 56.78             | <0.001*  |

Note: df, degree of freedom; MS, Mean Squared; Resid, Residual; n=number of observation; \*, statistically significant

**Table S3.** Canonical LDA and Standardized function coefficients

| Function                           | Canon correl. | Eigenvalue    | Variance    | LLR   | $F_{(7, 128)}$ | $P$        |
|------------------------------------|---------------|---------------|-------------|-------|----------------|------------|
| 1                                  | 0.717         | 1.06          | 1           | 0.486 | 19.37          | <0.001*    |
| Standardized function coefficients |               |               |             |       |                |            |
| Triceps SK                         | Biceps SK     | Suprailiac SK | Med Calf SK | CMJ   | Sprint 15m     | RSA 20+20m |
| 0.23                               | 0.02          | -0.5          | 0.04        | -0.45 | -2.39          | 1.26       |

Note: LDA, Linear Discriminant Analysis; Canon. correl., Canonical correlation; LLR, Likelihood Ratio; df, degree of freedom; \*, Statistically significant
